# Supplementary material for: How Many Hungarian Consumers Choose Lactose- and Gluten-Free Food Products Even When They Do Not Necessarily Need to?
Source: MDPI journal article supplement (doi:10.3390/foods12213984), 2023-10-31
Supplement: s1 [file s1]

**Felmérés az egészséges táplálkozást támogató élelmiszerekről 2018**

**Tisztelt Válaszadó!** Rövid kérdőívünk segítségével szeretnénk megismerni az egészséges táplálkozást támogató „egészséges élelmiszerekkel” kapcsolatos véleményét, ismereteit, fogyasztói szokásait. Kérdőívünk név nélküli, az Ön személye semmilyen módon nem azonosítható be. **Segítségét köszönjük! dr. Szabó Erika, Szakos Dávid (szakos.david@univet.hu)**

**Ön milyen mértékben ért egyet az alábbi állításokkal?**

*Kérjük, értékeljen 1-től 5-ig. 1: egyáltalán nem értek egyet; 5: teljes mértékben egyetértek*

|                                                                                |           |
|--------------------------------------------------------------------------------|-----------|
| Folyamatosan tájékozódok, tanulok az élelmiszerekről, a táplálkozásról         | ① ② ③ ④ ⑤ |
| Tudatosan választok márkát, gyártót, ha élelmiszerről van szó                  | ① ② ③ ④ ⑤ |
| Alaposan elolvasom a termékek címkéjét                                         | ① ② ③ ④ ⑤ |
| A táplálkozás közvetlen hatást gyakorol az egészségi állapotra                 | ① ② ③ ④ ⑤ |
| Fontos számomra, hogy egészségesen táplálkozzak                                | ① ② ③ ④ ⑤ |
| Az egészségesebb élelmiszerek kevésbé finomak                                  | ① ② ③ ④ ⑤ |
| Idősebb korban fokozottan számít a táplálkozás az egészség szempontjából       | ① ② ③ ④ ⑤ |
| Egészséges táplálkozással sokat tehetünk az időskori betegségek megelőzéséért  | ① ② ③ ④ ⑤ |
| Egy „egészséges élelmiszerért” hajlandó vagyok többet fizetni                  | ① ② ③ ④ ⑤ |
| Az „egészségesebb élelmiszerek” drágábbak                                      | ① ② ③ ④ ⑤ |
| Érdekel az egészséges táplálkozás                                              | ① ② ③ ④ ⑤ |
| Érdekelnek az életmóddal kapcsolatos tudományos kérdések                       | ① ② ③ ④ ⑤ |
| Többnyire otthon elkészített ételeket eszem                                    | ① ② ③ ④ ⑤ |
| Gyakran eszem étteremben                                                       | ① ② ③ ④ ⑤ |
| Gyakran fogyasztok laktózmentes (tejcukormentes) élelmiszereket                | ① ② ③ ④ ⑤ |
| Gyakran fogyasztok gluténmentes élelmiszereket                                 | ① ② ③ ④ ⑤ |
| Gyakran fogyasztok cukormentes élelmiszereket                                  | ① ② ③ ④ ⑤ |
| Gyakran fogyasztok szénhidrátmentes vagy szénhidrát-szegény élelmiszereket     | ① ② ③ ④ ⑤ |
| Véleményem szerint a tejtermékek segítik a fogyást                             | ① ② ③ ④ ⑤ |
| Az élelmiszerek íze a legfontosabb szempont, amikor vásárolok                  | ① ② ③ ④ ⑤ |
| Az élelmiszerek ára a legfontosabb szempont, amikor vásárolok                  | ① ② ③ ④ ⑤ |
| Az élelmiszerek márkája a legfontosabb szempont, amikor vásárolok              | ① ② ③ ④ ⑤ |
| Az élelmiszerek csomagolása a legfontosabb szempont, amikor vásárolok          | ① ② ③ ④ ⑤ |
| Az élelmiszerek hazai eredete a legfontosabb szempont, amikor vásárolok        | ① ② ③ ④ ⑤ |
| Az élelmiszerek minősége a legfontosabb szempont, amikor vásárolok             | ① ② ③ ④ ⑤ |
| Az élelmiszerek tápanyag-összetétele a legfontosabb szempont, amikor vásárolok | ① ② ③ ④ ⑤ |
| Az egészséges étrendbe való jó beilleszthetőség a fő vásárlási szempontom      | ① ② ③ ④ ⑤ |
| Véleményem szerint sok tejtermékek fogyasztásával könnyen elhízhatunk          | ① ② ③ ④ ⑤ |

**Ön szerint mit jelent az „egészséges élelmiszer” kifejezés? Kérjük, legalább egy-két olyan szót említsen, amely a fogalomról eszébe jut.**

|                                          |
|------------------------------------------|
| <br><br><br><br><br><br><br><br><br><br> |
|------------------------------------------|

**Amikor élelmiszert vásárol, mennyire jelent előnyt, ha az alábbi feliratokkal találkozol?**  
*Kérjük, értékeljen 1-től 5-ig. 1: egyáltalán nem fontos számomra; 5: nagyon fontos számomra*

|                                      |           |
|--------------------------------------|-----------|
| Energiaszegény                       | ① ② ③ ④ ⑤ |
| Csökkentett energiatartalmú          | ① ② ③ ④ ⑤ |
| Energiamentes                        | ① ② ③ ④ ⑤ |
| Zsírszegény                          | ① ② ③ ④ ⑤ |
| Zsírmentes                           | ① ② ③ ④ ⑤ |
| Telített zsírban szegény             | ① ② ③ ④ ⑤ |
| Telített zsírtól mentes              | ① ② ③ ④ ⑤ |
| Csökkentett telítettzsírsav-tartalmú | ① ② ③ ④ ⑤ |
| Hozzáadott cukrot nem tartalmaz      | ① ② ③ ④ ⑤ |
| Alacsony cukortartalmú               | ① ② ③ ④ ⑤ |
| Cukormentes                          | ① ② ③ ④ ⑤ |
| Nátriumszegény                       | ① ② ③ ④ ⑤ |
| Sószegény                            | ① ② ③ ④ ⑤ |
| Kifejezetten nátriumszegény          | ① ② ③ ④ ⑤ |
| Kifejezetten sószegény               | ① ② ③ ④ ⑤ |
| Nátriummentes                        | ① ② ③ ④ ⑤ |
| Sómentes                             | ① ② ③ ④ ⑤ |
| Élelmirost-forrás                    | ① ② ③ ④ ⑤ |
| Élelmi rostban gazdag                | ① ② ③ ④ ⑤ |
| Fehérjeforrás                        | ① ② ③ ④ ⑤ |
| Fehérjében gazdag                    | ① ② ③ ④ ⑤ |
| Megnövelt fehérjetartalom            | ① ② ③ ④ ⑤ |
| Vitamin-forrás                       | ① ② ③ ④ ⑤ |
| Vitaminban gazdag                    | ① ② ③ ④ ⑤ |
| Kalcium-forrás                       | ① ② ③ ④ ⑤ |
| Természetes kalcium-forrás           | ① ② ③ ④ ⑤ |
| Kalciumban gazdag                    | ① ② ③ ④ ⑤ |
| Kalciumban természetesen gazdag      | ① ② ③ ④ ⑤ |
| Pektint tartalmaz                    | ① ② ③ ④ ⑤ |
| Alacsony szénhidráttartalmú          | ① ② ③ ④ ⑤ |
| Laktózmentes                         | ① ② ③ ④ ⑤ |
| Gluténmentes                         | ① ② ③ ④ ⑤ |
| Élőflórás                            | ① ② ③ ④ ⑤ |
| Teljes kiőrlésű                      | ① ② ③ ④ ⑤ |
| Gyógynövény tartalmú                 | ① ② ③ ④ ⑤ |
| Antioxidáns tartalmú                 | ① ② ③ ④ ⑤ |
| Prebiotikus                          | ① ② ③ ④ ⑤ |
| Probiotikus                          | ① ② ③ ④ ⑤ |
| Light/lite                           | ① ② ③ ④ ⑤ |

**Ön szerint milyen típusú élelmiszerek fogyasztásával tesz a legtöbbet az egészségéért?**

*Kérjük, értékeljen 1-től 5-ig. 1: ezzel az élelmiszerral egyáltalán nem; 5: ezzel az élelmiszerral kifejezetten igen*

|                                   |           |
|-----------------------------------|-----------|
| Nyers gyümölcs                    | ① ② ③ ④ ⑤ |
| Joghurt                           | ① ② ③ ④ ⑤ |
| Tej                               | ① ② ③ ④ ⑤ |
| Kefir                             | ① ② ③ ④ ⑤ |
| Sajt                              | ① ② ③ ④ ⑤ |
| Vaj                               | ① ② ③ ④ ⑤ |
| Nyers zöldség                     | ① ② ③ ④ ⑤ |
| Tejföl                            | ① ② ③ ④ ⑤ |
| Túró                              | ① ② ③ ④ ⑤ |
| Gyógynövény tartalmú élelmiszerek | ① ② ③ ④ ⑤ |
| Méz                               | ① ② ③ ④ ⑤ |
| Olajos magvak, müzlik             | ① ② ③ ④ ⑤ |
| Margarin                          | ① ② ③ ④ ⑤ |
| Zöldség alapú élelmiszerek        | ① ② ③ ④ ⑤ |
| Gyümölcs alapú élelmiszerek       | ① ② ③ ④ ⑤ |
| Gomba alapú élelmiszerek          | ① ② ③ ④ ⑤ |
| Lekvár                            | ① ② ③ ④ ⑤ |
| Pékáruk                           | ① ② ③ ④ ⑤ |
| Hústermékek (pl. kolbász)         | ① ② ③ ④ ⑤ |
| Baromfihúsból készült ételek      | ① ② ③ ④ ⑤ |
| Sertéshúsból készült ételek       | ① ② ③ ④ ⑤ |
| Tojás és tojás alapú élelmiszerek | ① ② ③ ④ ⑤ |
| Haltermékek, halételek            | ① ② ③ ④ ⑤ |
| Gyümölcslevek, zöldséglevek       | ① ② ③ ④ ⑤ |
| Teák                              | ① ② ③ ④ ⑤ |

**Az Ön számára mennyire fontos, hogy egy „egészséges élelmiszer” rendelkezzen az alábbi tulajdonságokkal?**

*Kérjük, értékeljen 1-től 5-ig. 1: egyáltalán nem fontos ez a tulajdonság; 5: nagyon fontos tulajdonság*

|                                                                       |           |
|-----------------------------------------------------------------------|-----------|
| Kistermelő által előállított                                          | ① ② ③ ④ ⑤ |
| Biotermék                                                             | ① ② ③ ④ ⑤ |
| Hagyományos jellegű termék                                            | ① ② ③ ④ ⑤ |
| Hazai termék                                                          | ① ② ③ ④ ⑤ |
| Védjeggyel ellátott                                                   | ① ② ③ ④ ⑤ |
| Ismert gyártó által előállított                                       | ① ② ③ ④ ⑤ |
| Modern technológiával készült                                         | ① ② ③ ④ ⑤ |
| Genetikai módosítástól mentes                                         | ① ② ③ ④ ⑤ |
| Állatjóléti szempontok figyelembevételével készült                    | ① ② ③ ④ ⑤ |
| Hazai kutatók munkájának eredményeképpen jött létre                   | ① ② ③ ④ ⑤ |
| A hazai élelmiszerlánc-biztonsági hatóság (NÉBIH) vizsgálatai szerint | ① ② ③ ④ ⑤ |

## Az Ön háztartása hol szokott bevásárolni?

Osztályozzon 1-től 5-ig: 5: Nagyon jellemző – 1: Egyáltalán nem jellemző

|                                                 |           |
|-------------------------------------------------|-----------|
| Nagyobb boltban (pl. szupermarket, hipermarket) | ① ② ③ ④ ⑤ |
| Kisboltban                                      | ① ② ③ ④ ⑤ |
| Közvetlenül a termelőnél (például piacon)       | ① ② ③ ④ ⑤ |
| Interneten                                      | ① ② ③ ④ ⑤ |
| Saját magam termesztetem, vagy ajándékba kapom  | ① ② ③ ④ ⑤ |
| Egyéb, éspedig:                                 |           |

## Melyik állítás igaz és melyik hamis? Jelölje be a megfelelő választ.

| Állítás                                                               | Igaz                     | Hamis                    |
|-----------------------------------------------------------------------|--------------------------|--------------------------|
| A tartós tej jellegzetes íze a benne lévő tartósítószernek köszönhető | <input type="checkbox"/> | <input type="checkbox"/> |
| A boltban kapható tejet hőkezelik                                     | <input type="checkbox"/> | <input type="checkbox"/> |
| A hagyományos élelmiszerek génmentesek                                | <input type="checkbox"/> | <input type="checkbox"/> |
| Ha egy termékben baktériumok vannak, akkor az már nem biztonságos     | <input type="checkbox"/> | <input type="checkbox"/> |
| A természetes/bio élelmiszerek kockázatmentesek                       | <input type="checkbox"/> | <input type="checkbox"/> |
| A konzervekben van tartósítószer                                      | <input type="checkbox"/> | <input type="checkbox"/> |

## Ön szerint mik a laktózérzékenység tünetei?

## Ön szerint milyen módon tud tejtermékeket fogyasztani panaszmentesen egy laktózérzékeny ember?

## Az alábbi életmóddal kapcsolatos állítások közül melyikiek igazak Önre? Több választ is megjelölhet

- ☐ Rendszeresen sportolok
- ☐ Szeretnék leadni néhány kilót, és ezért teszek is
- ☐ Szeretném, hogy jobb legyen az állóképességem, erőnlétem, és ezért teszek is
- ☐ Túl keveset alszom
- ☐ Stresszes az életmódom
- ☐ Alapvetően egészségesnek érzem magam
- ☐ Kevés időt tudok az étkezésre, ételkészítésre fordítani
- ☐ Úgy érzem, hogy túl keveset mozgok
- ☐ Az átlagosnál jobban odafigyelek az étrendemre
- ☐ Napi rendszerességgel dohányzom
- ☐ Igyekszem kevesebb alkoholt fogyasztani
- ☐ Fogyasztok étrend-kiegészítőket

**Az Ön számára mely problémák aggasztóak, vagy melyekben érintett? Elkerülésükért anyagi kiadásokat is vállalna?**

| Probléma megnevezése           | Ez a probléma nem aggaszt/nem érint | Aggaszt/érint, de egyelőre <u>nem vállalom anyagi kiadásokat az elkerülése érdekében</u> | Aggaszt/érint, elkerülése érdekében <u>anyagi kiadásokat is vállalnék/vállalom</u> |
|--------------------------------|-------------------------------------|------------------------------------------------------------------------------------------|------------------------------------------------------------------------------------|
| Szív és érrendszeri betegségek | <input type="checkbox"/>            | <input type="checkbox"/>                                                                 | <input type="checkbox"/>                                                           |
| Magas koleszterinszint         | <input type="checkbox"/>            | <input type="checkbox"/>                                                                 | <input type="checkbox"/>                                                           |
| Daganatos betegség             | <input type="checkbox"/>            | <input type="checkbox"/>                                                                 | <input type="checkbox"/>                                                           |
| Hangulatzavar, alvászavar      | <input type="checkbox"/>            | <input type="checkbox"/>                                                                 | <input type="checkbox"/>                                                           |
| Légúti betegség                | <input type="checkbox"/>            | <input type="checkbox"/>                                                                 | <input type="checkbox"/>                                                           |
| Bőrbetegség, ekcéma            | <input type="checkbox"/>            | <input type="checkbox"/>                                                                 | <input type="checkbox"/>                                                           |
| Memórizavarok, dekoncentráció  | <input type="checkbox"/>            | <input type="checkbox"/>                                                                 | <input type="checkbox"/>                                                           |
| Emésztési problémák            | <input type="checkbox"/>            | <input type="checkbox"/>                                                                 | <input type="checkbox"/>                                                           |
| Migrén                         | <input type="checkbox"/>            | <input type="checkbox"/>                                                                 | <input type="checkbox"/>                                                           |
| Cukorbetegség                  | <input type="checkbox"/>            | <input type="checkbox"/>                                                                 | <input type="checkbox"/>                                                           |
| Ízületi betegségek             | <input type="checkbox"/>            | <input type="checkbox"/>                                                                 | <input type="checkbox"/>                                                           |
| Csontritkulás                  | <input type="checkbox"/>            | <input type="checkbox"/>                                                                 | <input type="checkbox"/>                                                           |
| Legyengült immunrendszer       | <input type="checkbox"/>            | <input type="checkbox"/>                                                                 | <input type="checkbox"/>                                                           |
| Allergia                       | <input type="checkbox"/>            | <input type="checkbox"/>                                                                 | <input type="checkbox"/>                                                           |
| Fogászati problémák            | <input type="checkbox"/>            | <input type="checkbox"/>                                                                 | <input type="checkbox"/>                                                           |
| Hormonális problémák           | <input type="checkbox"/>            | <input type="checkbox"/>                                                                 | <input type="checkbox"/>                                                           |
| Látásproblémák                 | <input type="checkbox"/>            | <input type="checkbox"/>                                                                 | <input type="checkbox"/>                                                           |
| Laktózérzékenység              | <input type="checkbox"/>            | <input type="checkbox"/>                                                                 | <input type="checkbox"/>                                                           |
| Gluténérzékenység              | <input type="checkbox"/>            | <input type="checkbox"/>                                                                 | <input type="checkbox"/>                                                           |

**Ha az Ön által megjelölt problémák többféle módon is kezelhetők/megelőzhetők lennének, az alábbi lehetőségek közül melyiket választaná legszívesebben? Több választ is megjelölhet**

| Kezelési/<br>Megelőzési<br>mód | Gyógyszer                | Étrend-<br>kiegészítő    | Egészségesebb<br>élelmiszerek | Életmód-<br>változtatás  |
|--------------------------------|--------------------------|--------------------------|-------------------------------|--------------------------|
| Probléma megnevezése           |                          |                          |                               |                          |
| Szív és érrendszeri betegségek | <input type="checkbox"/> | <input type="checkbox"/> | <input type="checkbox"/>      | <input type="checkbox"/> |
| Magas koleszterinszint         | <input type="checkbox"/> | <input type="checkbox"/> | <input type="checkbox"/>      | <input type="checkbox"/> |
| Daganatos betegség             | <input type="checkbox"/> | <input type="checkbox"/> | <input type="checkbox"/>      | <input type="checkbox"/> |
| Hangulatzavar, alvászavar      | <input type="checkbox"/> | <input type="checkbox"/> | <input type="checkbox"/>      | <input type="checkbox"/> |
| Légúti betegség                | <input type="checkbox"/> | <input type="checkbox"/> | <input type="checkbox"/>      | <input type="checkbox"/> |
| Bőrbetegség, ekcéma            | <input type="checkbox"/> | <input type="checkbox"/> | <input type="checkbox"/>      | <input type="checkbox"/> |
| Memórizavarok, dekoncentráció  | <input type="checkbox"/> | <input type="checkbox"/> | <input type="checkbox"/>      | <input type="checkbox"/> |
| Emésztési problémák            | <input type="checkbox"/> | <input type="checkbox"/> | <input type="checkbox"/>      | <input type="checkbox"/> |
| Migrén                         | <input type="checkbox"/> | <input type="checkbox"/> | <input type="checkbox"/>      | <input type="checkbox"/> |
| Cukorbetegség                  | <input type="checkbox"/> | <input type="checkbox"/> | <input type="checkbox"/>      | <input type="checkbox"/> |
| Ízületi betegségek             | <input type="checkbox"/> | <input type="checkbox"/> | <input type="checkbox"/>      | <input type="checkbox"/> |
| Csontritkulás                  | <input type="checkbox"/> | <input type="checkbox"/> | <input type="checkbox"/>      | <input type="checkbox"/> |
| Legyengült immunrendszer       | <input type="checkbox"/> | <input type="checkbox"/> | <input type="checkbox"/>      | <input type="checkbox"/> |
| Allergia                       | <input type="checkbox"/> | <input type="checkbox"/> | <input type="checkbox"/>      | <input type="checkbox"/> |
| Fogászati problémák            | <input type="checkbox"/> | <input type="checkbox"/> | <input type="checkbox"/>      | <input type="checkbox"/> |
| Hormonális problémák           | <input type="checkbox"/> | <input type="checkbox"/> | <input type="checkbox"/>      | <input type="checkbox"/> |
| Látásproblémák                 | <input type="checkbox"/> | <input type="checkbox"/> | <input type="checkbox"/>      | <input type="checkbox"/> |
| Laktózérzékenység              | <input type="checkbox"/> | <input type="checkbox"/> | <input type="checkbox"/>      | <input type="checkbox"/> |
| Gluténérzékenység              | <input type="checkbox"/> | <input type="checkbox"/> | <input type="checkbox"/>      | <input type="checkbox"/> |

**A táplálkozással és élelmiszerekkel kapcsolatos információk honnan jutnak el Önhöz?**  
*Osztályozzon 1-től 5-ig: 5: Innen kifejezetten igen – 1: Innen egyáltalán nem*

|                                 |           |
|---------------------------------|-----------|
| Televízió                       | ① ② ③ ④ ⑤ |
| Internetes híroldalak és blogok | ① ② ③ ④ ⑤ |
| Internetes közösségi oldalak    | ① ② ③ ④ ⑤ |
| Rádió                           | ① ② ③ ④ ⑤ |
| Család, ismerősök, rokonok      | ① ② ③ ④ ⑤ |
| Nyomtatott újságok, magazinok   | ① ② ③ ④ ⑤ |
| Iskola, egyetem, továbbképzés   | ① ② ③ ④ ⑤ |
| Egyéb, éspedig:                 |           |

**Van-e az Ön családjában laktózérzékeny?** ☐ Igen, én ☐ Igen, családtag ☐ Nincs

**Van-e az Ön családjában gluténérzékeny?** ☐ Igen, én ☐ Igen, családtag ☐ Nincs

**Amennyiben Ön fogyaszt laktózmentes termékeket, járt-e emiatt orvosnál?** ☐ Igen ☐ Nem

**Amennyiben Ön fogyaszt gluténmentes, járt-e emiatt orvosnál?** ☐ Igen ☐ Nem

## DEMOGRÁFIA

A kutatási eredmények feldolgozása érdekében kérjük, válaszoljon az alábbi, az Ön személyével kapcsolatos kérdéseinkre – a kutatás **név nélküli** és a feldolgozás módja garantálja, hogy **az Ön személye nem beazonosítható** a felmérésben.

Neme: ☐ Nő ☐ Férfi

Születési évszám: \_\_\_\_ \_

Lakóhelye (település típusa): ☐ Község/falu ☐ Város ☐ Főváros

Lakóhelye (megye): \_\_\_\_\_

### Az Ön befejezett legmagasabb iskolai végzettsége

- ☐ Általános iskola (8 vagy kevesebb osztály)
- ☐ Szakiskola (szakmunkás végzettség)
- ☐ Érettségi
- ☐ Főiskolai, egyetemi oklevél

### Az Ön gazdasági státusza (kérjük, csak egyet jelöljön meg)

- ☐ Aktív dolgozó (munkavállaló)
- ☐ Vállalkozó (önfoglalkoztató)
- ☐ Nyugdíjas, rokkant nyugdíjas
- ☐ Munkakereső
- ☐ Háztartásbeli, GYES-GYED
- ☐ Diák

A háztartásában lakók száma: 

|    |
|----|
| Én |
|----|

 + \_\_\_\_ fő

Van-e az Ön háztartásában 15 éven aluli gyermek? ☐ Van ☐ Nincs

Van-e olyan ok, amely miatt Önnek különleges étrendre van szüksége? *Több választ is megjelölhet!*

- ☐ Igen, cukorbetegség (diabetes)
- ☐ Igen, lisztérzékenység (cöliákia)
- ☐ Igen, tejfehérje érzékenység/allergia
- ☐ Igen, fogyni szeretne
- ☐ Igen, magas vérnyomás
- ☐ Igen, sportosabb, izmosabb szeretne lenni
- ☐ Igen, vegetáriánus/vegán
- ☐ Igen, valamilyen speciális diétát követ (pl. lúgosító, paleolit, nyers étel)
- ☐ Igen, egyéb okból kifolyólag: \_\_\_\_\_
- ☐ Nincs ilyen ok, de a családomban van
- ☐ Nincs ilyen ok

Ki az Ön háztartásában az „élelmiszerfelelős” vagyis ki hozza meg az élelmiszervásárlással, ételkészítéssel kapcsolatos döntéseket?

- ☐ Ön
- ☐ Közösén vagy munkamegosztásban
- ☐ Más személy

### Az Ön háztartásának jövedelemszintjére melyik állítás igaz?

- ☐ Még a legszükségesebb dolgok megvásárlása is nehézségekbe ütközik
- ☐ Szerényen, de megélünk
- ☐ Jövedelemszintünk átlagos, amit fontosnak tartunk, meg tudjuk venni
- ☐ Jövedelemszintünk átlag feletti
- ☐ Jövedelemszintünk kiemelkedő

Testtömege: ..... kg

Testmagassága: ..... cm
